# Supplementary material for: Pre-Exposure Prophylaxis with Hydroxychloroquine Does Not Prevent COVID-19 nor Virus Related Venous Thromboembolism
Source: MDPI journal article supplement (doi:10.3390/v13102052), 2021-10-13
Supplement: s1 [file s1]

**Table S1.** Campania Region Database (CaReDB) characteristics.

|                               |                                                                                                                                                                    |
|-------------------------------|--------------------------------------------------------------------------------------------------------------------------------------------------------------------|
| Characteristics               |                                                                                                                                                                    |
| Geographic area               | Campania, Italy                                                                                                                                                    |
| Population covered            | ~5.8 million inhabitants                                                                                                                                           |
| Age span covered              | Whole population                                                                                                                                                   |
| Time span covered a           | 2010–2019                                                                                                                                                          |
| Scope                         | Drug utilisation and outcome research; real-world evidences for public health; pharmacoepidemiologic and pharmacoeconomic analysis                                 |
| Data sources                  | Specific fields in the data sources contributing to a database                                                                                                     |
| Demographic information       | Patient ID; sex; date of birth; municipality of residence; district; local health unit                                                                             |
| Outpatient pharmacy records   | Patient ID; drug code; prescription date; delivery date; quantity; ATC code; price; defined daily dose; drug distribution channel (file F, file D)                 |
| Hospital-discharge records    | Patient ID; type of admission; date of admission; reasons for discharge; diagnoses (ICD-9 code); procedures (ICD-9 code); date of discharge; disease-related group |
| Type of codes for diagnoses   | Hospital: ICD-9-CM                                                                                                                                                 |
| Type of codes for medications | ATC classification                                                                                                                                                 |

ATC = Anatomical Therapeutic Chemical; ICD-9-CM = International Classification of Diseases, 9th Revision, Clinical Modification.

a Time span covered was 2009–2018 for hospital-discharge records and 2014–2019 for outpatient pharmacy records.
